# Supplementary material for: Early Diagnosis of Myocardial Infarction with Sensitive Cardiac Troponin Assays
Source: Atypon-hosted journal article supplement (doi:10.1056/nejmoa0900428), 2009-08-26
Supplement: nejm_reichlin_858sa1.pdf [file nejm_reichlin_858sa1.pdf]

## Supplementary Appendix

This appendix has been provided by the authors to give readers additional information about their work.

Supplement to: Reichlin T, Hochholzer W, Bassetti S, et al. Early diagnosis of myocardial infarction with sensitive cardiac troponin assays. *N Engl J Med* 2009;361:858-67.

| <b>Table 3 A</b>                       |               | <b>Diagnostic Performance of Cardiac Troponin at Presentation in Patients within 3 hours from Symptom Onset (n=222)</b> |                                 |                                               |                                               |
|----------------------------------------|---------------|-------------------------------------------------------------------------------------------------------------------------|---------------------------------|-----------------------------------------------|-----------------------------------------------|
|                                        |               | <b>Sensitivity<br/>(95% CI)</b>                                                                                         | <b>Specificity<br/>(95% CI)</b> | <b>Negative Predictive<br/>Value (95% CI)</b> | <b>Positive Predictive<br/>Value (95% CI)</b> |
| <b>Sensitive Troponin Assays</b>       |               |                                                                                                                         |                                 |                                               |                                               |
| <b>Abbott Troponin I</b>               |               |                                                                                                                         |                                 |                                               |                                               |
| Limit of Detection                     | (0.010 ug/l)  | 85 (66–96)                                                                                                              | 90 (85–94)                      | 98 (94–99)                                    | 55 (39–70)                                    |
| 99th Percentile                        | (0.028 ug/l)  | 70 (50–86)                                                                                                              | 96 (92–98)                      | 96 (92–98)                                    | 70 (50–86)                                    |
| 10% CV                                 | (0.032 ug/l)  | 70 (50–86)                                                                                                              | 96 (93–99)                      | 96 (92–98)                                    | 73 (52–88)                                    |
| <b>Roche High-Sensitive Troponin T</b> |               |                                                                                                                         |                                 |                                               |                                               |
| Limit of Detection                     | (0.002 ug/l)  | 100 (87–100)                                                                                                            | 15 (11–21)                      | 100 (88–100)                                  | 14 (10–20)                                    |
| 99th Percentile                        | (0.014 ug/l)* | 85 (66–96)                                                                                                              | 84 (78–89)                      | 98 (94–99)                                    | 42 (29–56)                                    |
| <b>Roche Troponin I</b>                |               |                                                                                                                         |                                 |                                               |                                               |
| Limit of Detection                     | (0.100 ug/l)  | 85 (66–96)                                                                                                              | 91 (86–95)                      | 98 (95–99)                                    | 58 (41–73)                                    |
| 99th Percentile                        | (0.160 ug/l)  | 63 (42–81)                                                                                                              | 96 (93–99)                      | 95 (91–98)                                    | 71 (49–87)                                    |
| 10% CV                                 | (0.300 ug/l)  | 41 (22–61)                                                                                                              | 98 (95–99)                      | 92 (88–96)                                    | 73 (45–92)                                    |
| <b>Siemens Troponin I Ultra</b>        |               |                                                                                                                         |                                 |                                               |                                               |
| Limit of Detection                     | (0.006 ug/l)  | 92 (75–99)                                                                                                              | 74 (67–80)                      | 99 (95–100)                                   | 33 (22–45)                                    |
| 99th Percentile                        | (0.040 ug/l)* | 77 (56–91)                                                                                                              | 95 (90–97)                      | 97 (93–99)                                    | 67 (47–83)                                    |
| <b>Standard Troponin Assay</b>         |               |                                                                                                                         |                                 |                                               |                                               |
| <b>Roche Troponin T 4th Generation</b> |               |                                                                                                                         |                                 |                                               |                                               |
| 99th Percentile                        | (unknown)     |                                                                                                                         |                                 |                                               |                                               |
| Limit of Detection                     | (0.010 ug/l)  | 56 (35–75)                                                                                                              | 95 (91–98)                      | 94 (90–97)                                    | 60 (39–79)                                    |
| 10% CV                                 | (0.035 ug/l)  | 44 (26–65)                                                                                                              | 99 (96–100)                     | 93 (88–96)                                    | 80 (52–95)                                    |

\* Criterion of 10% CV fulfilled at 99th percentile

| <b>Table 3 B</b>                 |                                 | <b>Diagnostic Performance of Cardiac Troponin at Serial Sampling (Area under the Curve, 95% CI)</b> |                            |                            |                            |  |
|----------------------------------|---------------------------------|-----------------------------------------------------------------------------------------------------|----------------------------|----------------------------|----------------------------|--|
|                                  | <b>Presentation<br/>(n=718)</b> | <b>1 hour<br/>(n=519)</b>                                                                           | <b>2 hours<br/>(n=440)</b> | <b>3 hours<br/>(n=413)</b> | <b>6 hours<br/>(n=299)</b> |  |
| <b>Sensitive Troponin Assays</b> |                                 |                                                                                                     |                            |                            |                            |  |
| Abbott Troponin I                | 0.96 (0.94-0.98)                | 0.97 (0.96-0.99)                                                                                    | 0.96 (0.93-0.99)           | 0.98 (0.97-0.99)           | 0.97 (0.95-0.99)           |  |
| Roche High-Sensitive Troponin T  | 0.96 (0.94-0.98)                | 0.98 (0.96-0.99)                                                                                    | 0.96 (0.93-0.99)           | 0.98 (0.97-0.99)           | 0.98 (0.96-0.99)           |  |
| Roche Troponin I                 | 0.95 (0.92-0.97)                | 0.96 (0.93-0.99)                                                                                    | 0.96 (0.92-1.00)           | 0.98 (0.96-0.99)           | 0.96 (0.92-0.99)           |  |
| Siemens Troponin I Ultra         | 0.96 (0.94-0.98)                | 0.97 (0.96-0.99)                                                                                    | 0.96 (0.93-1.00)           | 0.98 (0.97-1.00)           | 0.97 (0.94-0.99)           |  |
| <b>Standard Troponin Assay</b>   |                                 |                                                                                                     |                            |                            |                            |  |
| Roche Troponin T                 | 0.90 (0.86-0.94)                | 0.95 (0.91-0.98)                                                                                    | 0.95 (0.91-0.99)           | 0.97 (0.94-1.00)           | 0.98 (0.96-0.99)           |  |

| <b>Table 3 C</b>                 |                       | <b>Diagnostic Performance of Absolute Values of Early Changes (<math> \Delta 1h-0h </math> and <math> \Delta 2h-0h </math>) in Cardiac Troponin and the Combination of the Troponin Level at Presentation with Early Changes during Serial Sampling (Area under the Curve, 95% CI)</b> |                                                        |                                                |                                                        |  |
|----------------------------------|-----------------------|----------------------------------------------------------------------------------------------------------------------------------------------------------------------------------------------------------------------------------------------------------------------------------------|--------------------------------------------------------|------------------------------------------------|--------------------------------------------------------|--|
|                                  | <b>0h<br/>(n=718)</b> | <b><math> \Delta 1h-0h </math><br/>(n=519)</b>                                                                                                                                                                                                                                         | <b>0h plus <math> \Delta 1h-0h </math><br/>(n=519)</b> | <b><math> \Delta 2h-0h </math><br/>(n=440)</b> | <b>0h plus <math> \Delta 2h-0h </math><br/>(n=440)</b> |  |
| <b>Sensitive Troponin Assays</b> |                       |                                                                                                                                                                                                                                                                                        |                                                        |                                                |                                                        |  |
| Abbott Troponin I                | 0.96 (0.94-0.98)      | 0.95 (0.92-0.98)                                                                                                                                                                                                                                                                       | 0.97 (0.96-0.99)                                       | 0.96 (0.93-0.99)                               | 0.97 (0.95-0.99)                                       |  |
| Roche High-Sensitive Troponin T  | 0.96 (0.94-0.98)      | 0.93 (0.89-0.97)                                                                                                                                                                                                                                                                       | 0.98 (0.96-0.99)                                       | 0.95 (0.91-0.99)                               | 0.97 (0.96-0.99)                                       |  |
| Roche Troponin I                 | 0.95 (0.92-0.97)      | 0.88 (0.83-0.93)                                                                                                                                                                                                                                                                       | 0.95 (0.92-0.98)                                       | 0.91 (0.85-0.96)                               | 0.96 (0.94-0.99)                                       |  |
| Siemens Troponin I Ultra         | 0.96 (0.94-0.98)      | 0.94 (0.90-0.97)                                                                                                                                                                                                                                                                       | 0.96 (0.94-0.99)                                       | 0.95 (0.91-0.99)                               | 0.97 (0.94-0.99)                                       |  |
| <b>Standard Troponin Assay</b>   |                       |                                                                                                                                                                                                                                                                                        |                                                        |                                                |                                                        |  |
| Roche Troponin T                 | 0.90 (0.86-0.94)      | 0.95 (0.91-0.98)                                                                                                                                                                                                                                                                       | 0.95 (0.91-0.99)                                       | 0.95 (0.91-0.99)                               | 0.96 (0.93-0.99)                                       |  |
